# Supplementary material for: Characteristics of surface damage in China during the 25 April 2015 Nepal earthquake
Source: Copernicus journal article supplement (doi:10.5194/nhess-2018-195), 2018-07-27
Supplement: Supplementary file [file nhess-2018-195-AC3-supplement.pdf]

1 Effects of the 25 April 2015 Nepal earthquake in the Tibetan  
2 border region of China and increased post-seismic hazards

3

4 Zhonghai Wu <sup>a\*</sup> Patrick J. Barosh <sup>b\*</sup>, Xin Yao <sup>a</sup>, Yongqiang Xu <sup>c</sup>, and Jie Liu <sup>d</sup>

5

6 a Key Laboratory of Neotectonic Movement & Geohazard, Ministry of Natural  
7 Resources, Institute of Geomechanics, Chinese Academy of Geological Sciences,  
8 Beijing 100081, China

9 b P.J. Barosh and Associates, 103 Aaron Avenue, Bristol, RI 02809, USA and Visiting  
10 Research Fellow, Chinese Academy of Geological Sciences, Beijing 100081  
11 China

12 c China Institute of Geo-environment Monitoring, Beijing 100081, China

13 d College of Resource Environment and Tourism, Capital Normal University, Beijing  
14 100048, China

15

16 **Abstract:** The seismic effects in Nyalam, Gyirong, Tingri and Dinggye counties along  
17 the southern border of Tibet were investigated during 2-8 May, 2015, a week after the  
18 great Nepal earthquake along the Main Himalaya Thrust. The intensity was VIII in the  
19 region and reached IX at two towns on the Nepal border; resulting in the destruction of  
20 2,700 buildings, seriously damaging over 40,000 others, while killing 27 people and  
21 injuring 856 in this sparsely populated region. The main geologic effects in this steep  
22 rugged region are collapses, landslides, rockfalls, and ground fissures; many of which  
23 are reactivations of older land slips. These did great damage to the buildings, roads and  
24 bridges in the region. Most of the effects are along four incised valleys which are  
25 controlled by N-S trending rifts and contain rivers that pass through the Himalaya  
26 Mountains and flow into Nepal; at least two of the larger aftershocks occurred along the  
27 normal faults. Areas weakened by the earthquake pose post-seismic hazards. Three  
28 valleys have the potential for dangerous post-seismic debris flows that could create  
29 dangerous dams especially during the monsoon season. Loosened rock and older slides  
30 also may fail. In addition, there is an increased seismic hazard along active N-S  
31 trending grabens in southern Tibet due to the shift in stress resulting from the thrust  
32 movement that caused the Nepal earthquake. NW trending right-lateral strike-slip  
33 faults also may be susceptible to movement. The results of the findings are incorporated  
34 in some principle recommendations for the repair and reconstruction after the  
35 earthquake.

36

37 **Key Words:** Nepal earthquake, Himalaya Mountains, Seismic hazard, Post-seismic  
38 hazard

39

---

Corresponding author: Wu Zhong-hai and Patrick J. Barosh, E-mail: wuzhonghai@geomech.ac.cn,  
[pjbarosh@fullchannel.net](mailto:pjbarosh@fullchannel.net)

40 On 25 April 2015 at 14:11:26 MGT+8 (Beijing Time), a great Ms 8.1 (Mw 7.8)  
41 earthquake struck Nepal and adjacent regions killing more than 8,800 people and  
42 injuring more than 23,000. The epicenter was near Pokhara 77 km northwest of the  
43 capital of Kathmandu and the hypocenter was at a depth of 10-24 km. Many aftershocks  
44 of magnitude 4.5  $M_w$  or greater followed, of which a Ms 7.5 (Mw 7.3) aftershock  
45 occurred after 17 days, on 12 May 2015 at 15:05. This epicenter was near the Chinese  
46 border 77 km east-northeast of Kathmandu and the hypocenter was at a depth of 12-16  
47 km.

48 The main earthquake occurred on the south slope of the Himalaya Mountains and  
49 formed a 120-140 km long, about 80 km wide rupture zone with a dip-slip of 3.5-5.5 m,  
50 which shows an expansion from west to east (USGS, 2015 a, b; IRIS, 2015). The  
51 aftershock distribution, the focal mechanism solution and the source rupture inversion  
52 suggest that the earthquake was a release of built-up strain along the Main Himalaya  
53 Thrust fault zone and part of the ongoing process of the Indian Plate underthrusting the  
54 Eurasian Plate (Fig. 1). This was the strongest seismic event since the 2005 Ms 7.8  
55 Pakistan Kashmir earthquake, which also occurred along the Main Himalaya Thrust.  
56 These earthquakes may indicate that the seismic activity along the thrust is entering a  
57 new active phase.

58 The earthquake affected Nepal, northern India, Pakistan, Bhutan, and the southern  
59 Tibet region of China, which is the focus of this paper. In China the tremors were felt in  
60 Xigazê and Lhasa to the north and over 300,000 km<sup>2</sup>, but were strongest in the  
61 China-Nepal border area which is only about 40 km (Fig. 1, 2) from the epicenter  
62 (Table 1). Despite the great loss of life in Nepal the disaster caused only 27 deaths, 856  
63 injuries and 3 missing in China, although the damage was extensive. About 30 thousand  
64 people were affected and the direct economic loss is more than 33,000 million Yuan  
65 (RMB) (5.178 trillion U.S. dollars). Fortunately, the border area has a low population  
66 density and the earthquake occurred in the afternoon when many were outside,  
67 otherwise the casualty and economic loss would have been much higher. Due to the  
68 rapid response of the local governments the displaced people were soon resettled in  
69 southern Tibet.

70 An emergency seismic hazard investigation group of 12 people was organized by  
71 the Ministry of Land and Resources to survey the hardest hit four counties of Nyalam,  
72 Gyirong, Tingri and Dinggye during 2-8 May, a week after the main shock, in order to  
73 quickly understand the earthquake effects and potential future threats to provide a basis  
74 for the post-earthquake reconstruction. The group then held meetings with the local  
75 governments to present their findings and recommendations. This paper is a brief  
76 summary of the direct effects observed in the field and investigations into the delayed  
77 effects that may cause as much damage.

## 78 **1. Seismic-Geological Setting**

79 The Tibetan Plateau is well known for its numerous E-W to NW, north-dipping  
80 thrust faults (MHT) that facilitated its rise as the India plate collided and was thrust  
81 beneath it. Most of the uplift occurred by the Miocene (Dewey et al, 1988; Wu et al.,  
82 2008) and the majority of the thrust faults came to a stop as the movement evolved and  
83 concentrated along fewer strike-slip faults, which remain very active and capable of  
84 great earthquakes (Armijo et al., 1989; Fig. 1). However, thrusting remains dominant in  
85 the collision zone at the south edge of Tibet south of the Himalaya Mountains with the  
86 continued northward movement of India. Here the greatest activity occurs along the  
87 very shallow north-dipping Main Himalaya Thrust, which gave rise to the Nepal  
88 earthquake and has a long history of great earthquakes along its length (Fig. 1). Less  
89 generally known are a series of nearly N-S-trending normal faults and grabens to the  
90 north of the great thrust that complement some of the movement across it. These also  
91 are capable of producing significant earthquakes, although they are much shorter in  
92 length (Wu et al, 2011). This array of active faults plus a set of NW right-lateral  
93 strike-slip faults, which may aid extension, constitute the seismic framework of the  
94 region.

95 The China-Nepal border region is located on the south slope of the Himalaya  
96 Mountains close to the Main Himalaya Thrust and contains many active normal faults  
97 that control the transverse valleys that lead into Nepal. The high, rugged, steep

98 topography and the well-developed incised river valleys in this region further amplify  
99 the destruction caused by earthquakes. Therefore, it is not strange that southern Tibet  
100 was greatly affected by the Nepal earthquake.

101

## 102 **2. Surface damage features**

103 Landslides, rockfalls and collapses are common widespread occurrences during  
104 large earthquakes in the mountainous regions of Tibet. The Nepal earthquake was no  
105 exception, even though there was no nearby surface fault offset. The 2008 Ms 8.0  
106 Wenchuan earthquake and its aftershocks at the eastern edge of Tibet produced  
107 hundreds of thousands of such landslips (Wang and Han, 2010; Tang et al., 2011; Yang  
108 et al., 2015). They caused major destruction and casualties, in addition to blocking river  
109 valleys and forming reservoirs that threatened downstream communities. It was only a  
110 massive emergency effort by the government that prevented additional major  
111 calamities. Several small dams were formed by the Nepal earthquake, but no large ones  
112 that needed an emergency excavation, although the threat remains.

113 The geologic effects caused by the Nepal earthquake are mainly landslides, terrace  
114 and loose material collapses and debris flows, rockfalls, and ground fissures that were  
115 studied in detail at 33 sites in four towns in Nyalam, Gyirong, Tingri and Dinggye  
116 Counties (Figs. 2 and 6). These vary with the intensity, amount of rock weakened by  
117 previous movement, steepness of slope and lithology. These landslips diminish in  
118 number and size northward from the Nepalese border with the decrease in intensity. In  
119 the areas approaching intensity IX landslides and collapses are widespread and include  
120 some large landslides; in the area encompassing intensity VIII small collapses and  
121 landslides were common, but large landslides are rare; intensity VII areas contain some  
122 small landslides, collapses and rockfalls along valley slopes and roadcuts; whereas in  
123 the area of intensity VI small collapses and landslides are rare and a small amount of  
124 rockfalls occurred near roadcuts.

125 These surface damages have the following characteristics:

126 (1) They are all disrupted slides, as classified by Varnes (1978; updated by Hungr  
127 et al., 2014), with a loss of internal cohesion.

128 (2) They occur most densely along four incised river valleys, which are controlled  
129 by N-S-trending rifts that pass through the Himalaya Mountains and enter into Nepal  
130 (Fig. 2). The four valleys, successively from west to east, are: the Gyirong Zangbo  
131 valley that follows the Gyirong Graben and extends southwards (Figs. 5b and 6e), the  
132 Boqu River valley that follows the Nyalam Graben and passes through Zhangmu and  
133 connects to the Sunkoxi River valley in Nepal (Figs. 5a and 6a); the Rongxiaqu valley  
134 that follows the southwest side of the Kong Co-Gangga Graben to pass through  
135 Rongxia and descend to the Sunkoxi River valley in Nepal (Fig. 5c) and, the Pengqu  
136 River valley, controlled by the Paiku Co Rift, that crosses the Kung Co-Gangga Graben  
137 and the Pengqu Graben southwards and passes through Chentang to connect to the  
138 Arun River in Nepal (Fig. 5d). The topographic relief in these valleys is generally about  
139 2,000-3,000 m, which is very favorable for various landslips during seismic events.  
140 Furthermore, there is an overall tendency for the number and size of collapses,  
141 landslides, and rockfalls to increase towards Nepal along these valleys.  
142 Remotely-sensed images issued by Google Earth after the earthquake show that the  
143 Gyirong Zangbo and the Buqu River valleys contain the maximum density and scale of  
144 collapses and landslides (Figs. 5a, 5b, and 6a-6h).

145 Moreover, some dammed lakes due to the collapsed rock and soil can be seen in  
146 these valleys of Nepal. For example, in the Gyirong Zangbo valley, a 0.07 km<sup>2</sup> dammed  
147 lake and a 0.04 km<sup>2</sup> dammed lake occur about 2.5 km north of and about 7.3 km  
148 southwest of Dhunche Village, respectively, and in the Boqu River valley, a 0.24 km<sup>2</sup>  
149 dammed lake occurs on the north side of Dabi Village.

150 (3) Surface damages occur often in weak, soft geologic material and unstable  
151 geomorphic positions: joint or fault-formed, high, steep bedrock cliffs and slopes (Figs.  
152 6b and 6e); high, steep slopes of loose Quaternary sediment forming river terraces,  
153 proluvial fans, and benches (Figs. 6d and 6f) and; unstable slopes and highway road  
154 cuts (Figs. 6g and 6h). These landslides mostly occur on slopes steeper than 35-45  
155 degrees.

156 (4) The collapses and landslides commonly result from reactivation of older ones  
157 and similar effects produced by historic earthquakes occurred near the same position as  
158 in this earthquake. Such features are notable on both banks of the Boqu River near  
159 Zhangmu (Figs. 7a and 7b). At Disigang Village of Zhangmu, for example, a house  
160 built on the side of a large rock brought down previously was destroyed by a new large  
161 rockfall (Fig. 6c). This is a warning that reconstruction after the earthquake, not only  
162 should avoid as far as possible potential new hazards, but at the same time be aware of  
163 previous ones and make a comprehensive assessment of their stability.

164 (4) Most of large ground fissures are associated with collapses and landslides. They  
165 either occur on the displaced masses or around their edges and only a few such fissures  
166 occur on surface of loose sediments (Fig. 8).

167 These rock and soil slips caused the most serious casualties and damage. The worst  
168 collapse found occurred in Disigang Village about 0.8 km southwest of Zhangmu  
169 where about 0.016 km<sup>3</sup> of debris destroyed four or five buildings and killed seven  
170 people (Figs. 4a, 6b and 6c). The largest landslide found occurred about 1.3 km  
171 southwest of Chongse Village near Jilong where about 2,700,000 m<sup>3</sup> of material  
172 blocked the main highway from Jilong to Gyirong Port (Fig. 6e). In addition, 27 small  
173 landslides and collapses occurred along the 14 km length of highway stretching from  
174 this landslide to Gyirong Port.

175 An important discovery was that the earthquake induced landslide and collapse  
176 generally occurred where previous ones had taken place and correlated in size with the  
177 previous ones. This apparently reflects the effects of ancient earthquakes and provides  
178 new evidence for paleo-seismicity both in location and size. More significantly this  
179 demonstrates the areas of ancient landslide and collapse indicate the potential areas of  
180 danger from further landslips from torrential rains and future earthquakes; important  
181 considerations in seismic risk evaluation and the post-earthquake reconstruction  
182 process.

### 183 3. Seismic Intensity

184 A broad region of southern Tibet was affected by the earthquake, but the sparse  
185 population and difficult terrain did not permit defining of the felt area well. Most  
186 isoseismics for the lower intensities were compiled by the China Earthquake  
187 Administration, which made a quick, overall survey of towns in order to assess the  
188 damage (Fig. 1). However, a detailed field survey, reported below, was made in the  
189 region most affected. The principal effects of the earthquakes are the damage suffered  
190 by structures, highways and bridges and the landslides, collapses and rockfalls. The  
191 landslips caused much of the damage to the construction. Overall 2,699 houses and one  
192 temple were destroyed, 39,981 houses and 242 temples seriously damaged, and about  
193 2,600 km of main highways, 263 bridges, and a part of the communication, power and  
194 water facilities were damaged to some degree in southern Tibet as reported by the  
195 China Earthquake Administration. In the region more closely studied in the field the  
196 damage and seismic intensity were evaluated at 29 sites in 10 affected counties (Fig. 2,  
197 and Table 1).

198 The intensity was evaluated using the Chinese seismic intensity scale (GB/T  
199 17742-2008) (CSIS), which is a revised national standard implemented in 2009, that  
200 has 12 degrees of intensity (GB/T, 2008). This was modified from the GEOFIAN  
201 (Medvedev) scale, that in turn was adapted from the Modified Mercalli scale and is  
202 closely aligned with it, except in the lower units (Barosh, 1969) and is approximately  
203 the same in the higher units reported on herein. The latest CSIS scale revision added an  
204 additional building type for evaluation in reflecting newer construction in the country.

205 The perception of the earthquake, damage to buildings of different material and  
206 structure, and surface effects show obvious differences as recorded at the different  
207 levels of intensity. Only a few people in a room might have felt the earthquake in Lhasa  
208 at intensity III, whereas, to most of the people both inside and outside of buildings in  
209 Xigazê city the earthquake was obvious and demonstrates an intensity IV and strong  
210 damage indicates approximately intensity IX at the Nepal border.. The increasing and  
211 varying degrees of damage of buildings and disruptions of the surface in the VI to IX

212 intensity zones were reviewed in the field in southern Tibet nearer Nepal (Table 1). The  
213 intensity described herein is a composite of both the main shock and the large after  
214 shock. This may have caused an enhancement of the ratings if they were for the main  
215 shock alone, because some structures weakened by it were further damaged or  
216 destroyed by the large aftershock.

217 Of the four counties investigated, Nyalam County is located on the south slope of  
218 the Himalaya Mountains, whereas Gyirong, Tingri, and Dinggye Counties are located  
219 north of the mountains (for their seismic intensities, see Table 1). The main effects and  
220 economic losses are concentrated in Nyalam, Tingri, and Gyirong Counties (Fig. 2)  
221 where about 80% of the houses were completely destroyed or damaged to a large extent  
222 (Figs. 3, 4). The damage is heaviest in the towns of Zhangmu in Nyalam County; Jilong  
223 and Sale in Gyirong County, and Rongxia in Gyirong County (Fig. 5). Moreover, the  
224 highways and communications to the towns of Zhangmu, Tingri, and Resuo Bridge as  
225 well as connections to Zhangmu, Tingri, Chentang and others in Nyalam County were  
226 greatly damaged and broken.

227 The specific structural damage is usually related to the material and type of  
228 building construction in these areas where the heaviest destruction occurred near the  
229 Nepal border. In this region of few trees most of the houses are of simple stone and  
230 adobe construction and these fared poorly during the earthquake; with the majority  
231 being destroyed near Nepal (Figs. 3b, 3d, 3e, 4c). Houses with cement bonded stone or  
232 brick construction survived much better (Figs. 3a, 4d) and those of good brick or  
233 reinforced concrete construction suffered the least (Figs. 3c, 4f) and provided a contrast  
234 with those of poorer materials (Figs. 3a, 4e).

235 The Chinese intensity scale considers the varying effects on different building  
236 types and this usually improves the reliability of the general intensity assignment, but  
237 locally it may lead to assigning different values, if there is a greater variation in damage  
238 than usual between types. This could be the case in these areas where the effects appear  
239 to reach either intensity VIII or IX depending on the type of structure used to assign  
240 intensity. The apparent highest intensity, IX, from destruction, that equaled some parts  
241 of Kathmandu, for older self-built stone masonry or adobe structures with poor seismic



242 resistance, whereas for the newly built cement-bonded stone, brick or concrete  
243 structures it was no more than intensity VIII and the rating lies between (Figs. 3 and 4).  
244 For example, in Jifu Village about 2.4 km south of Jilong, all the houses built of stone  
245 block masonry were almost completely destroyed, whereas most newly built ones of  
246 cement-bonded stone or brick are still standing with only minor cracks in the walls (Fig.  
247 4c-d), and the same variation also is seen at the Sale Town Primary School (Fig. 4e).  
248 The inhabitants of this area had to be quickly moved to temporary settlements (Fig. 4b).  
249 Perhaps some poorer buildings weakened by the first earthquake were collapsed by the  
250 second one or the newer buildings had more seismic resistance than realized. Some  
251 undetected ground slippage at a few locations throughout the region also may have  
252 augmented the effects to a slight degree.

253 The E-W elongation of the intensity pattern (Fig. 2, Table 1) shows at least twice  
254 the rate of attenuation northward towards the Himalaya Mountains than in an E or W  
255 direction. This can be attributed to the absorption of the seismic energy by the  
256 E-W-trending fault structure and lithologic units of the great Himalaya Mountain block,  
257 plus a contribution from the E-W spread of the earthquakes and aftershocks.

258 There is no direct record of ground motion from the Nepal earthquake in Tibet. A  
259 network of strong motion stations is being expanded across China with a significant  
260 concentration in the more seismically active regions, but unfortunately, the network  
261 does not yet extend across the Tibetan region and thus, there is only one station at Lhasa,  
262 too distant to provide data. Thus, the range of ground motions typically associated with  
263 each intensity value in China has to suffice.

264

#### 265 **4. Post-seismic Increased Potential Geological Hazard**

266 The Nepal earthquake has left many potential dangers in its wake in this region and  
267 nearby seismically active areas in southern Tibet that do not fit into an intensity scale  
268 yet are a consequence of the earthquake and pose a serious hazard that might create  
269 even greater damage and casualties than the immediate effects. The delayed effects in

270 southern Tibet are the consequences of earthquake-loosened landslides and weakened  
271 rock that may fall due to aftershocks and torrential storms and from secondary  
272 earthquakes due to changes in the stress field resulting from the Nepal earthquakes.

273 Rock, terrace material and previous landslides loosened by the earthquake, but still  
274 in place may fail with small aftershocks and torrential rains, which further weaken the  
275 material and add weight. Such an increase in secondary landslips during rainy seasons  
276 following earthquakes has been noted previously and is becoming a recognized hazard.  
277 Increased rainfall-triggered landslide activity above normal rates have been observed  
278 after several large earthquakes; two of which occurred in similar terrane to the east and  
279 west (Hovius et al., 2011; Saba et al., 2010; Tang et al., 2011; Dadson et al., 2004). Rain  
280 may even be a factor during an earthquake. Data in New Zealand suggest that  
281 earthquakes that occur during wetter months trigger more landslides than those during  
282 drier periods; although a clear relationship between rainfall-induced pore pressure and  
283 earthquake-induced landslide triggering has not been shown (Dellow and Hancox,  
284 2006; Parker et al., 2015). When the typhoon Toraji hit Taiwan following the 2005 Mw  
285 7.6 Chi-Chi earthquake, 30,000 more landslides occurred with many being reactivated  
286 ones triggered by the earthquake, although 80% of the Toraji landslides occurred in  
287 areas that had not failed during the earthquake (Dadson et al., 2004). The proportion of  
288 surface area disturbed by the landslides increased towards the active fault suggesting  
289 that even in areas that underwent no landslips during the earthquake the substrate was  
290 preconditioned to fail through loss of cohesion and frictional strength of hill slope rock  
291 mass caused by the strong seismic motion (Dadson et al., 2004).

292 A similar general weakening of rock strength was deduced in the mountainous  
293 region of South Island, New Zealand where to test the possible influence of previous  
294 earthquakes in preconditioning the ground for landsliding, the areas of overlap of high  
295 intensity of similar strong, >Mw 7, 1929 and 1968 earthquakes were compared (Parker  
296 et al., 2015). Many landslides produced in 1968 were reactivations or enlargements of  
297 ones that failed in 1929, but others were not, although there was a higher degree of  
298 failure in the overlapped area than could be easily explained in considering all the  
299 factors normally involved in landslip. These observations suggested that hill slopes

300 may retain damage from past earthquakes, which makes them more susceptible to  
301 failure in future triggering events, and this had influenced the behavior of the landscape  
302 in the 1968 earthquake. It was further suggested that the damage legacy of large  
303 earthquakes may persist in parts of the landscape for much longer than the observed  
304 less than 10 year periods of post-seismic landslide activity and sediment evacuation.

305 Similarly, data from the 2010 Mw 7.1 Canterbury – 2011 Ms 6.3 Christchurch  
306 earthquake sequence reveal landslide triggering at lower ground accelerations  
307 following the February 2011 earthquake, which caused cracks to develop in hill slopes  
308 that subsequently failed in later earthquakes in the sequence (Massey et al., 2014a,  
309 2014b; Parker et al., 2015).

310 This general loosening of rock by ground motion also occurred at the Nevada Test  
311 Site where deep underground nuclear explosions, similar to shallow earthquakes,  
312 caused widespread movement along joints within the overlying bedrock (Barosh, 1968).  
313 Some fractures were propagated upward through 610 m of alluvium to demonstrate  
314 how even this soft material was weakened further.

315 The progressive brittle damage accumulation in hill slope materials may lead to  
316 permanent slope displacement that results in cracking and dilation of the mass, which  
317 makes them more susceptible to failure (Petley et al., 2005; Nara et al., 2011; Bagde  
318 and Petroš, 2009; Li et al., 1992b; Parker et al., 2015). Whether or not a hill slope fails  
319 in response to an earthquake thus, becomes a function of both a current event and the  
320 history of damage accumulated from previous events (Parker et al., 2015).

321 These later landslides pose all of the same dangers as those occurring during the  
322 initial earthquake and also may cause damming of rivers to create dangerous reservoirs  
323 that can fail with devastating effects.

324 The landslips also increase the hazard from flooding in the disturbed region. They  
325 contribute debris to valleys to widen them and raise river beds that greatly raises the  
326 flood danger as has happened in the region of the Wenchuan earthquake since 2008  
327 (Yang et al., 2015). This is a problem that needs to be recognized in post-earthquake  
328 reconstruction.

329 Such consequences from earthquakes are long lasting. It is estimated to have taken

330 three years for the Kashmir earthquake region to recover; six for the Chi-chi earthquake;  
331 over seven for the Wenchuan earthquake and even longer for others (Saba et al., 2010;  
332 Yang et al., 2015; Dadson et al., 2004).

333 There is a worry of additional landslides and rock falls after the Nepal earthquake,  
334 especially of large ones, that might block river valleys and impound water. Indeed, both  
335 the number and range of collapse and rock fall has clearly increased in this year's rainy  
336 season following the earthquake. Chengcan Zhou (2015) noted that before the  
337 earthquake collapses and rockfalls only occurred on steep hill slopes on both sides of  
338 the Bo Qu River north of Zhangmu Town, but now take place along the entire highway  
339 in this area. He reports that the increased hazard has caused many road closures and  
340 damaged vehicles, but no casualties as yet, because the town was evacuated after the  
341 earthquake. The increased hazards are mainly distributed nearby along the highway  
342 between Nyalam to Zhangmu where eighteen major landslide groups have been  
343 identified after the earthquake by the National Disaster Reduction Center of the  
344 Ministry of Civil Affairs using high resolution remote sensing images. Such an increase  
345 in the number of slides should be widespread in several major valleys of southern Tibet,  
346 but relatively few have been reported due to scarce personnel and poor transportation  
347 and communication.

348 Unstable masses found to date are: the reactivated landslide group at Zhangmu,  
349 collapse of the upper edge of the Sale Village landslide in Sale, potential failure of the  
350 dangerous rock mass at the Rongxia Primary School, and instability of the old Natang  
351 Village landslide and its upper edge at Chentang Town.

352 All of Zhangmu is located on a group of old landslides (Figs. 4a, 7a and 7b).  
353 Discontinuous tension fissures, which are tens to hundreds of meters long, about 10 cm  
354 wide and 2 to 4 m deep, were found at its upper edge and on its sides after the  
355 earthquake (Figs. 8a and 8b). These fissures indicate the possibility of the failure of the  
356 entire landslide group.

357 The Sale Village landslide, which resulted from the earthquake, on the slope along  
358 the highway from Sale Village to Seqiong Village (Fig. 5b). It is nearly 600,000 m<sup>3</sup> in  
359 volume and its fall blocked the road. Large tension fissures at its upper edge indicate a

360 danger of further slippage (Fig. 8c).

361 The dangerous rock mass at the Rongxia Village Primary School occupies a  
362 convex portion of the cliff behind the school and appears unstable (Figs. 5c and 8d). A  
363 rockfall occurred here during the earthquake, but the fall appears to have been  
364 incomplete and left a cliff that lacks stability and is susceptible to further rockfall.

365 Natang Village near Chentang is located at the front, lower edge of an old landslide,  
366 which is about 420 m long and 230 m wide, and consists of about 1,200,000 m<sup>3</sup> (Figs.  
367 5d and 8e). The steep wall at its upper edge appears as two large dangerous rock blocks  
368 which are about 60,000 m<sup>3</sup> in volume and a 1.7 m wide preexisted crack occurs between  
369 the unstable rock blocks and the bedrock (Fig. 8f). The earthquake caused a partial  
370 rockfall and demonstrates the dangerous instability of the mass that might come down  
371 easily.

372 The danger of post-seismic debris flows also must be stressed, although these were  
373 rare for this earthquake in the southern Tibet region; they were a serious problem in the  
374 Wenchuan earthquake (Cui et al., 2010; Tang et al, 2011). There is, however, a  
375 considerable amount of loose debris accumulated in mountain valleys and gullies that  
376 could provide material for further debris flows, especially on the south slope of the  
377 Himalaya Mountains. Rainfall, which provides excessive water to lubricate land slips  
378 and adds weight to a loose mass, is a key factor in inducing post-seismic debris flows as  
379 well as triggering landslides and rockfalls. There is a large difference in rainfall  
380 between the south and north slopes of the Himalaya Mountains. The annual average  
381 rainfall at Zhangmu on the south slope is up to 2,556.4 mm/a, whereas the annual  
382 average rainfall in Jilong and the seat of Nyalam County on the north slope is only  
383 880.3 mm/a and 654.0 mm/a, respectively. The rainfall on the south slope is  
384 concentrated in the Indian Ocean summer monsoon season and induced debris flows  
385 were already being reported in Nepal at the beginning of June. The several incised  
386 valleys in the south mentioned above are sites of potentially dangerous post-seismic  
387 debris flows in Tibet particularly in the three deeply incised valleys leading toward  
388 Nepal that have a high potential for flows that could dam the rivers to form dangerous  
389 lakes. These valleys, from west to east, are: The Gyirong Zangbo River in the upper

390 basin of the Trisuli River, the Boqu River and the Rongxiaqu River in the upper basin of  
391 the Sunkoxi River (Fig. 2). Another danger spot is in the Dianchang gully on the south  
392 side of Zhangmu (Figs. 5a and 7a) where considerable loose debris is in a very unstable  
393 state.

394

## 395 **5. Discussion**

### 396 **5.1 Pattern of surface damages**

397 The Nepal earthquake was felt over a wide region of southern Tibet. Fortunately,  
398 few casualties occurred, because of the sparse population, but there was extensive  
399 damage due to the presence of many poorly built stone and adobe buildings and the  
400 impact of landslides, collapses and rockfalls in this steep mountainous region of high  
401 relief; the intensity near the Nepal border approached IX. The intensity distribution  
402 showed that the attenuation rate northward was more than twice that in either eastward  
403 or westward directions due to the absorption of energy by the major E-W-trending  
404 structure of the region and the trend of the seismic activity in the epicentral area. The  
405 intensity survey demonstrated a very wide difference in seismic performance between  
406 these poorly built buildings and well-built brick and concrete ones. In addition to the  
407 immediate damage shown by the intensity, there are the delayed effects of further  
408 dangerous land movement and an increased potential for a significant earthquake over  
409 the next several years; all of which are important in consideration of the seismic hazard  
410 in the region and post-earthquake reconstruction.

411 The numerous landslides, collapses and rockfalls occurred on slopes steeper than  
412 35-45 degrees and usually at locations where previous one took place. This apparently  
413 reflects the effects of ancient earthquakes and provides new evidence for  
414 paleo-seismicity. The presence of large landslides, which either did not fail or only  
415 partially so, also suggests that larger earthquakes affected this region in the past. These  
416 sites of ancient and modern slips mark the hazardous areas in future earthquakes; an  
417 important consideration in seismic risk evaluation and the post- earthquake

418 reconstruction process.

419 The Nepal earthquake both changed and brought out features that enhance the  
420 seismic hazard in the near and long term. The principal geologic dangers emanate from  
421 landslides, collapses and rockfalls in this steep terrane from ones loosened or only  
422 partially failed immediately or new ones from ground weakened by the general ground  
423 shaking of the earthquake. These will be more common in the next three to six years or  
424 so as a delayed effect of the earthquake, especially in seasons of heavy rainfall. All of  
425 the areas of older landslips, whether or not they reactivated in this earthquake, are  
426 susceptible to reactivation and are particularly dangerous. In recent years it has been  
427 discovered that ground motion from large earthquakes results in weakened  
428 cohesiveness of the ground and causes more abundant landslips subsequently. These  
429 may clog valleys to form dangerous reservoirs. Such an increase in landslips has  
430 already been note in the study area this past summer.

431 Both the landslips during an earthquake and the delayed ones contribute debris to  
432 the river valleys to widened them and raise riverbeds to create conditions for flooding.  
433 This can destroy additional buildings and endanger bridges as in the area of the  
434 Wenchuan earthquake (Yang et al., 2015).

435 Following these characteristics, we should focus three circumstances in the  
436 assessments of seismic geological hazards (mainly refers to collapse, landslips and  
437 rockfall here) within the many strong earthquakes and high relief area:

438 (1) steep slopes formed by loose bodies, such as thick alluvial and residual deposits,  
439 in deep valleys;

440 (2) places with multiple periods of landslides, collapses and rockfalls;

441 (3) the revival possibility of known landslides and collapses in future earthquakes.

## 442 **5.2 Relationship between MHT with N-trending rifts**

443 The Nepal earthquake has likely set the stage for another forceful nearby  
444 earthquake that can be considered a delayed effect. The release of energy in a great  
445 earthquake such as the Nepal earthquake may shift the strain in the adjacent regions

446 where other earthquakes may then occur, such as the strong earthquakes that occurred  
447 in Tibet following the Ms 8.0 Wenchuan earthquake (Wu et al, 2011). The seismic  
448 history of southern border of Tibet appears to bear this out. Large earthquakes along the  
449 south margin on the Main Frontal Thrust of the Main Himalayan Thrust are followed by  
450 ones along the N-S-trending normal faults in the region to the north (Fig. 1). There now  
451 is an increased concern that a significant earthquake may occur along the normal faults  
452 in the region based on this past history

453 Southern Tibet is an earthquake-prone region with long E-W-trending active thrust  
454 faults such as caused the Nepal Earthquake; less well known are the important active  
455 normal faults and grabens just to the north (Figs. 1 and 2). These normal faults form at  
456 least eight nearly N-S-trending rifts across southern Tibet. Geological estimates and  
457 GPS data show that the E-W extension rates cross the rifts were 10-13 mm/a during the  
458 Quaternary and Holocene (Armijo et al., 1986; Chen et al., 2004). Such rates are close  
459 to the Holocene slip rate of  $21 \pm 1.5$  mm/a along the Main Frontal Thrust of the Main  
460 Himalaya Thrust (Lav é and Avouac, 2000) and to the recent GPS-based shortening rate  
461 of 10-19 mm/a across the Himalaya orogenic belt (Larson et al., 1999; Jouanne, et al.,  
462 1999; Zhang et al., 2004; Bettinelli et al., 2006). There thus, appears to be a close  
463 kinematic connection between the thrusting on the Main Himalaya Thrust and the  
464 nearly N-S-trending normal faulting in the southern Tibet region as indicated by the  
465 historic seismicity (Armijo et al, 1989; Molnar and Lyon-Caen, 1989).

466 Often within a short time interval of about one to 10 years after great earthquakes  
467 on the Main Himalaya Thrust, strong earthquakes occur on the N-S-trending normal  
468 faults in the southern Tibet region (Fig. 9). For example, the great Kashmir earthquake  
469 of 1400 was followed by a M 8.0 earthquake in the Damxung-Yangbajain sector of the  
470 northern Yadong-Gulu Rift in 1411; a M 8.1 earthquake in the western part of Nepal in  
471 1803 was followed by a M 7.5 earthquake in the southern sector of the Cona-Oiga Rift  
472 in 1806, and the M 7.8 Kashmir earthquake of 1905 was followed by a M 7.5  
473 earthquake at Sangri in the northern sector of the Cona-Oiga Rift in 1915. Similarly,  
474 after the M 8.1 1934 Nepal earthquake, a M 7.0 earthquake in the same year occurred in  
475 the N-S-trending Gomang Co graben in northeastern Xainza County and after the 1950



476 M 8.6 China-Indian border earthquake, a M 7.5 earthquake occurred in 1952 in the  
477 northern sector of the Yadong-Gulu Rift in Nagqu County.

478 Another delayed effect of the earthquake is the enhanced seismic hazard due to the  
479 release in energy and the shift in strain, based on the past seismic history. The Nepal  
480 earthquake emphasizes the close relation between the seismic activity and the dynamics  
481 in the nearly east-west stretch of deformation along the Himalaya foothills and the  
482 controlling activity along the Main Himalaya Thrust, which triggered the Nepal  
483 earthquake. Extensional forces about perpendicular to the active thrust have a history of  
484 resulting in a nearby significant normal fault earthquake following thrust movement  
485 within the subsequent 10 years that results in further destruction and fatalities. Some  
486 normal fault activity has indeed been noted in the aftershocks of the Nepal earthquake,  
487 but not nearly enough to release the expected strain.

488 On the first and second day after the 2015 Nepal earthquake a Mw 5.4 earthquake  
489 occurred in Nyalam County and a Ms 5.9 earthquake in Tingri County, respectively.  
490 Both are nearly N-S-trending normal faulting-type earthquakes: the former occurred in  
491 the Nyalam-Coqên Rift and the latter at the southern end of the Xainza-Dinggye Rift.  
492 However, these movements are unlikely to have released all the built up extensional  
493 force. Recently, Elliott et al. (2010) found from the InSAR and body wave  
494 seismological images of normal faulting earthquakes that the extension rate due to the  
495 contribution of the seismic energy released through normal faulting for the past 43  
496 years in the southern Tibet region is 3-4 mm/a, which is only equivalent to 15-20% of  
497 the extension rate obtained by GPS measurements. This suggests that there still is about  
498 80% of the energy due to extension to be released, possibly as near-future seismic  
499 activity.

500 The extension also may affect a set of NW-trending right-lateral strike-slip fault  
501 zones that have significant activity in the southern Tibet region. These are from west to  
502 east: The Karakorum fault zone, the Gyaring Co fault zone, and the Bengcuo fault zone  
503 (Fig. 1). Their Quaternary strike-slip rate may reach 10-20 mm/a (Armijo et al., 1989;  
504 Chevalier et al., 2005). Such faults with high strike-slip rates also can play an important  
505 role in adjusting of the nearly E-W extensional deformation in the area. For example, a

506 M 8.0 earthquake in southwestern Nagqu in 1951, which occurred along the  
507 NW-trending Bengco fault zone, followed the 1950 M 8.6 Zay ü earthquake of eastern  
508 Tibet that is known in India as Assam earthquake.

509 Based on past experience, the southern Tibetan region in the vicinity of the Nepal  
510 earthquake is likely to have a normal fault earthquake within the next 10 years.

### 511 **5.3 Recommendations**

512 This investigation is preliminary and generalized, but tentative recommendations  
513 can be issued to guide reconstruction in the region.

514 First, southern Tibet is a region with remarkable historical seismicity where  
515 earthquakes and their effects cannot effectively be forecasted, but a reevaluation of the  
516 earthquake hazards should be made as soon as possible to indicate the potential dangers  
517 noted in this survey.

518 Second, the relocation and reconstruction of damaged residential areas needs to  
519 consider the potential dangers of post-seismic hazards and stability of previous  
520 seismically induced geologic effects. Areas of ancient landslides, collapse and rockfall,  
521 in particular need to be mapped and avoided, specially for schools, hospital, utilities  
522 and vital government buildings and, where impossible, roads and bridges. Bridges  
523 might be rebuilt higher in valleys where riverbeds may be raised and the flood danger  
524 enhanced due to increased debris flow from the displaced material. And for the same  
525 reason selection of building sites in valleys must be chosen with care. A wide selection  
526 for new, safer sites for construction should be provided in the vast southern Tibetan  
527 region with its very low population density.

528 Third, in the repair and reconstruction of buildings, new anti-seismic construction  
529 codes must be adopted. The replacement of poorly built stone and adobe building by more  
530 seismic resistant brick and concrete ones should be given a high priority.

531 Forth, over the next 10 years there should be heightened awareness and  
532 preparations for a possible earthquake in one of the grabens of southern Tibet.

533 Finally, although more detailed seismic-geological study is, of course, necessary,  
534 the greater urgency should be directed at the construction of better anti-seismic

535 buildings and facilities in areas away from potential geological hazards that may be  
536 triggered by earthquakes.

537

## 538 **6. Conclusions**

539 Surface damages caused by Nepal earthquake in Tibet vary with the intensity,  
540 amount of rock weakened by previous movement, steepness of slope and lithology. And  
541 the damages show directional features mainly developed in the N-trending rifts in  
542 southern Tibet. The surface damages directional features, paleo-earthquakes and  
543 deformational rate also suggest that the E-W extensional deformation in southern Tibet  
544 is close associated with the Himalaya thrust fault. Therefore, the dangerous of  
545 earthquakes and seismic hazards in southern Tibet should be attracted more attention in  
546 the future.

547

## 548 **ACKNOWLEDGEMENTS**

549 This work was supported by grants from the Geological Survey Program of the  
550 Geological Survey of China (No. 12120114002101) and the National Natural Science  
551 Foundation of China (No. 41571013). We would like to thank Professor Tingshan Tian  
552 and Jietang Lu of the China Institute of Geo-environment Monitoring, Professor Qiang  
553 Xu and Doctor Guang Zheng of Chengdu University of Technology, Professor Ji Duo  
554 and Baoben Xia of Geology and Mineral Resources Exploration Bureau of Xizang  
555 Autonomous Region for their participating of our field investigation. We also  
556 appreciate the help extended by the Department of Land and Resources of Xizang  
557 Autonomous Region and relevant local governments.

558

## 559 **References**

560 Armijo R., P. Tapponnier, L. Mercier and H. Tonglin (1986). Quaternary extension in southern  
561 Tibet :Field observation and tectonic implication, *J. Geophys. Research*,

562           **91**(B14),13803-13872.

563 Armijo R., P. Tapponnier and T. Han (1989). Late Cenozoic right-lateral strike-slip faulting in  
564 southern Tibet, *J. Geophys. Research*, **94**, 2787-2838.

565 Avouac, J-P. (2007). Dynamic processes in extensional and compressional settings – mountain  
566 building: from earthquakes to geological deformation, *Treatise on Geophys.*, **6**, 377-439.

567 Bagde, M. N. and V. Petroš, (2009). Fatigue and dynamic energy behaviour of rock subjected to  
568 cyclical loading, *Int. J. Rock. Mech. Min.*, **46**, 200–209.

569 Bettinelli, P., J-P. Avouac, M. Flouzat (2006). Plate motion of India and interseismic strain in the  
570 Nepal Himalaya from GPS and DORIS measurements, *J. Geod.*, **80**, 567–589, DOI  
571 10.1007/s00190-006-0030-3.

572 Bilham, R., (2004). Earthquakes in India and the Himalaya: tectonics, geodesy and history, *Annals*  
573 *Geophys.*, **47**(2-3), 839–858.

574 Chen Qizhi, J.T. Freymueller, Zhiqiang Yang, et al. (2004). Spatially variable extension in southern  
575 Tibet based on GPS, *J. Geophys. Research*, **109**, B09401, doi:10.1029/2002JB002350.

576 Chevalier, M.-L., F.J. Ryerson, P. Tapponnier, R.C. Finkel, J. Van Der Woerd, Haibing Li, and Qing,  
577 Liu, (2005). Slip-Rate measurements on the Karakorum fault may imply secular variations in  
578 fault Motion, *Sci.* **307**, 411-414.

579 China Earthquake Administration (2015). An intensity map of Tibet for the M 8.1 Nepal earthquake.  
580 [http://www.cea.gov.cn/publish/dizhenj/468/553/101803/101809/20150501221123458562190/](http://www.cea.gov.cn/publish/dizhenj/468/553/101803/101809/20150501221123458562190/index.html)  
581 [index.html](http://www.cea.gov.cn/publish/dizhenj/468/553/101803/101809/20150501221123458562190/index.html).

582 Cui P., J-Q. Zhuang, X-Ch. Chen, et al. (2010). Characteristics and countermeasures of debris flow  
583 in Wenchuan area after the earthquake, *J. Sichuan Univ, ( Engineer. Sci. Ed.)*, **42**(5), 10-19.

584 Dadson, S.J., N. Hovius, H. Chen, W.B. Dade, , J.C. Lin,, M.L. Hsu, C.W. Lin, M.J. Horng, T.C.  
585 Chen, J. Milliman, C.P. Stark (2004). Earthquake-triggered increase in sediment delivery from  
586 an active mountain belt, *Geol.*, **32**, 733–736, 2004.

587 Dellow, G.D. and G.T. Hancox (2006). The influence of rainfall on earthquake-induced landslides in  
588 New Zealand, in, *Proceed. Tech. Groups, Earthqs. and Urban Develop: New Zealand Geotech.*  
589 *Soc. 2006 Sym.*, Nelson, New Zealand, 355–368.

590 Dewey, J., R.M. Shackleton, C. Chang, and Y. Sun (1988). The tectonic evolution of the Tibetan  
591 Plateau, *Philos. Trans. R. Soc. London, Ser. A*, **327**, 379-413.

592 Elliott J.R., R.J. Walters, P.C. England, J.A. Jackson, Z. Li, and B. Parsons (2010). Extension on the  
593 Tibetan plateau: recent normal faulting measured by InSAR and body wave seismology,  
594 *Geophys. J. Internat.*, **183**, 503-535. doi: 10.1111/j.1365-246X.2010.04754.x

595 GB/T (2008) GB/T 17742-2008, Standardization Admin. China.

596 Hovius, N., P. Meunier, C.-W. Lin, H. Chen, Y.-G. Chen, S. Dadson, M.-J. Horng, M. Lines (2011).  
597 Prolonged seismically induced erosion and the mass balance of a large earthquake, *Earth*  
598 *Planet. Sc. Lett.*, **304**, 347–355, doi:10.1016/j.epsl.2011.02.005.

599 Hungr, O., S. Leroueil, L. Picarelli (2014) The Varnes classification of landslide types, an update,  
600 *Landslides*, **11**, 167–194, doi:10.1007/s10346-013-0436-y.

601 Institute of Geophysics, (2015). The M5.9 Tingri earthquake of April 25 2015 in Tibet, *China*  
602 *Earthq. Admin.*, <http://www.cea-igp.ac.cn/tpxw/272116.shtml>.

603 IRIS (2015). Special event: Nepal, *Incorp. Research Insts for Seis*,  
604 <http://ds.iris.edu/ds/nodes/dmc/specialevents/2015/04/25/nepal>.

605 Jouanne, F., J.L. Mugnier, M.R. Pandey, J.F. Gamond, P. LeFort, L. Serrurier, C. Vigny, J.P. Avouac  
606 and the Idylhim members (1999). Oblique convergence in the Himalayas of western Nepal  
607 deduced from preliminary results of GPS measurements, *Geophys. Research Letts.* **26**,  
608 1933–1936.

609 Larson, K., R. Burgmann, R. Bilham, J.T. Freymueller (1999). Kinematics of the India-Eurasia  
610 collision zone from GPS measurements, *J. Geophys. Res.*, **104**, 1077–93.

611 Lave ´, J., and J.P. Avouac (2000). Active folding of fluvial terraces across the Siwaliks Hills,

612 Himalayas of central Nepal, *J. Geophys. Research*, **105**, 5735–5770.

613 Li, G., K.H.R Moelle, J.A Lewis (1992). Fatigue crack growth in brittle sandstones, *Int. J. Rock*  
614 *Mech. Min.*, 29, 469–477.

615 Massey, C.I., F. Della Pasqua, T. Taig, B. Lukovic, W. Ries, D. Heron, G. Archibald (2014a)  
616 Canterbury Earthquakes 2010/11 Port Hills Slope Stability: Risk assessment for Redcliffs, *GNS*  
617 *Sci., Wellington, New Zealand*, p. 123 C Appendices.

618 Massey, C.I., T. Taig, F. Della Pasqua, B. Lukovic, W. Ries, G. Archibald (2014b). Canterbury  
619 Earthquakes 2010/11 Port Hills Slope Stability: Debris avalanche risk assessment for  
620 Richmond Hill, *GNS Sci. Consultancy Rept.* 2014/34.

621 Molnar, P., and H. Lyon-Caen (1989). Fault plane solutions of earthquakes and active tectonics of  
622 the Tibetan Plateau and its margins, *Geophys. J. Internat.*, **99**, 123–153.

623 Nara, Y., K. Morimoto, T. Yoneda, N. Hiroyoshi, K. Kaneko (2011) Effects of humidity and  
624 temperature on subcritical crack growth in sandstone, *Int. J. Solids Structures*, 48, 1130–1140.

625 Parker, R.N., G.T. Hancox, D.N. Petley, Massey, A.L. Densmore, N. J. Rosser (2015). Spatial  
626 distributions of earthquake-induced landslides and hillslope Preconditioning in the northwest  
627 South Island, New Zealand, *Earth Surface Dynamics*, 3, (4): 501 DOI:  
628 10.5194/esurf-3-501-2015

629 Petley, D.N., S.A. Dunning, N.J. Rosser (2005) The analysis of global landslide risk through the  
630 creation of a database of worldwide landslide fatalities, in: *Landslide Risk Management*, eds.  
631 Hungr, O., R. Fell, R. Couture, E. Eberhardt, Balkema, The Netherlands.

632 Saba, S. B., M. van der Meijde, H. van der Werff (2010). Spatiotemporal landslide detection for the  
633 2005 Kashmir earthquake region, *Geomorph.* 124, 17–25,  
634 doi:10.1016/j.geomorph.2010.07.026, 2010.

635 Tang, Ch., W-L. Li and J. Ding (2011). Field investigation and research on giant debris flow on  
636 august 14, 2010 in Yingxiu town, epicenter of Wenchuan earthquake, *Earth Sci.-J. China Univ.*  
637 *Geosci.*, **36**(1), 172-180. doi:10.3799/dqkx.2011.018

638 The Science and Technology Committee and the archives in Xizang Autonomous Region (1982).  
639 Tibet earthquakes; historical compilation, (v.1), *People's Publishing House, Xizang*, 1-583 (in  
640 Chinese).

641 USGS (2015a). Updated finite fault results for the Apr 25, 2015 Mw 7.9 35 km E of Lamjung, Nepal  
642 Earthquake (Version 2), U.S. Geol. Sur., Nat'l. Earthq. Info. Center,  
643 <http://earthquake.usgs.gov/earthquakes/eventpage/us20002926#scientific> finite fault

644 USGS (2015b). Updated finite fault results for the May 12, 2015 Mw 7.3 22 km SE of Zham, China  
645 Earthquake (Version 2), U.S. Geol. Sur. Nat'l Earthq. Info. Center,  
646 <http://earthquake.usgs.gov/earthquakes/eventpage/us20002ejl#scientific> finitfault

647 Wang, Xiuying, Zhenlin Han (2010). Modeling of landslides hazards induced by the 2008  
648 Wenchuan earthquake using ground motion parameters, *in* Xie, editor, *Rock stress and*  
649 *earthquakes*, Taylor & Francis Group, London, p. 297-304, ISBN\_978.0.415.60165.8

650 Wu, Zhenhan., P.J. Barosh, Zhonghai Wu, Daogong Hu, Xun Zhan and Peisheng Ye. (2008), Vast  
651 early Miocene lakes of the central Tibetan Plateau, *Geol. Soc. Amer., Bull.*, 120, 1326-1337.

652 Wu, Zhonghai, Peisheng Ye, P.J. Barosh and Zhenhan Wu (2011). The October 6, 2008 Mw 6.3  
653 magnitude Damxung earthquake, Yadong-Gulu rift, Tibet, and implications for present-day  
654 crustal deformation within Tibet, *J. Asian Earth Sci.*, **40**, (4), 943–957.

655 Zhang, P.Z., Z. Shen, M. Wang, W.J. Gan, R. Burgmann and P. Molnar (2004). Continuous  
656 deformation of the Tibetan Plateau from global positioning system data, *Geol.*, **32**, 809-812.

657 Zhou, Chengcan (2015). Personal communication, November, 2015. *Tibetan Environmental*  
658 *Monitoring Station*.

659 Yang, W.T., M. Wang, N. Kerle, C.J. Van Westen, L.Y. Liu, and P.J. Shi (2015). Analysis of changes

660 in post-seismic landslide distribution and its effect on building reconstruction, *Nat. Hazards.*  
661 *Earth Syst. Sci.*, 15, 817-825. doi:10.5194/nhess-15-817-2015  
662

## Tables

Table 1 Location of surveyed sites of earthquake intensity in southern Tibet

| site               | coordinate         | intensity | note      |
|--------------------|--------------------|-----------|-----------|
| Lhasa city         | 29.65 N, 91.12 E   | III       | felt area |
| Xaitongmoin town   | 29.432 N, 88.259 E | III       | felt area |
| Xigazê city        | 29.27 N, 88.88 E   | IV        | felt area |
| Nâdong city        | 29.23 N, 91.76 E   | IV        | felt area |
| Gamba town         | 28.276 N, 88.516 E | VI        |           |
| Sagya town         | 28.903 N, 88.020 E | VI        |           |
| Lhazê town         | 29.087 N, 87.634 E | VI        |           |
| Ngamring town      | 29.298 N, 87.234 E | VI        |           |
| Sangsang town      | 29.420 N, 86.724 E | VI        |           |
| Saga town          | 29.329 N, 85.233 E | VI        |           |
| Gyirong town       | 28.856 N, 85.297 E | VI        |           |
| Tingri town        | 28.661 N, 87.122 E | VI        |           |
| Dinggyê town       | 28.367 N, 87.772 E | VI        |           |
| Riwu town          | 28.012 N, 87.681 E | VI        |           |
| Rema villiage      | 28.459 N, 85.224 E | VII       |           |
| Bangse villiage    | 28.083 N, 86.368 E | VII       |           |
| Rongxia town       | 28.057 N, 86.342 E | VII       |           |
| Chentang town      | 27.868 N, 87.414 E | VII       |           |
| Natang villiage    | 27.850 N, 87.441 E | VII       |           |
| Jilong town        | 28.396 N, 85.327 E | VIII      |           |
| Sale town          | 28.365 N, 85.445 E | VIII      |           |
| Guoba villiage     | 28.365 N, 85.457 E | VIII      |           |
| Zuobude villiage   | 28.037 N, 86.297 E | VIII      |           |
| Zhangmu town       | 27.990 N, 85.982 E | IX        |           |
| Disgang villiage   | 27.984 N, 85.979 E | IX        |           |
| Lixin villiage     | 27.960 N, 85.971 E | IX        |           |
| Kodari town, Nepal | 27.972 N, 85.962 E | IX        |           |
| Jifu villiage      | 28.374 N, 85.329 E | IX        |           |
| Chongse villiage   | 28.373 N, 85.362 E | IX        |           |

Table 2 Distribution of seismic intensity in the southern Tibet region from the Nepal earthquake.

| Intensity | Area (km <sup>2</sup> ) | city, county and town covered by seismic intensity                                                                                                                             | damage of building and surface                                                                                                                                                                                                                                                            |
|-----------|-------------------------|--------------------------------------------------------------------------------------------------------------------------------------------------------------------------------|-------------------------------------------------------------------------------------------------------------------------------------------------------------------------------------------------------------------------------------------------------------------------------------------|
| IX        | 105                     | The Zhangmu Town of Nyalam County, Jilong Town of Gyirong County.                                                                                                              | Most of the mud-brick and stone piled up building were collapsed and severely damaged and some brick houses also have obvious damage and partial collapse. Collapse and landslide is widespread, and the existence of large landslides.                                                   |
| VIII      | 1,945                   | The Zhangmu Town and Nyalam Town of Nyalam County, Jilong Town and Sale Town of Gyirong County, Rongxia Town of Tingri County.                                                 | Some of the mud-brick and stone piled up buildings were collapsed or severely damaged, but the buildings of brick structure are mainly moderate to slightly damaged and are more of the wall cracks. Medium and small collapses and landslides are common but are rarely large landslide. |
| VII       | 9,590                   | Gyirong County, Nyalam County, Tingri County and Dinggye County.                                                                                                               | A few of the mud-brick and stone piled up buildings were severely damaged, but most buildings are slightly damaged only. There are some small collapses, landslides and rockfalls along slope of valley and highway roadcuts.                                                             |
| VI        | 35,460                  | Zhongba County, Saga County, Gyirong County, Nyalam County, Tingri County and Dinggye County, Gamba County, S <sup>h</sup> gya County, Ngamring County and Lhaz <sup>h</sup> e | Only a few the mud-brick and stone piled up buildings were slightly damaged, and collapses and landslides are rare. A small amount of rockfall may appear near the highways roadcuts.                                                                                                     |
| Felt area | 300,000                 | Lhasa, Xigaz <sup>h</sup> e Burang, Gar and N <sup>h</sup> êlong etc.                                                                                                          |                                                                                                                                                                                                                                                                                           |



## Figures

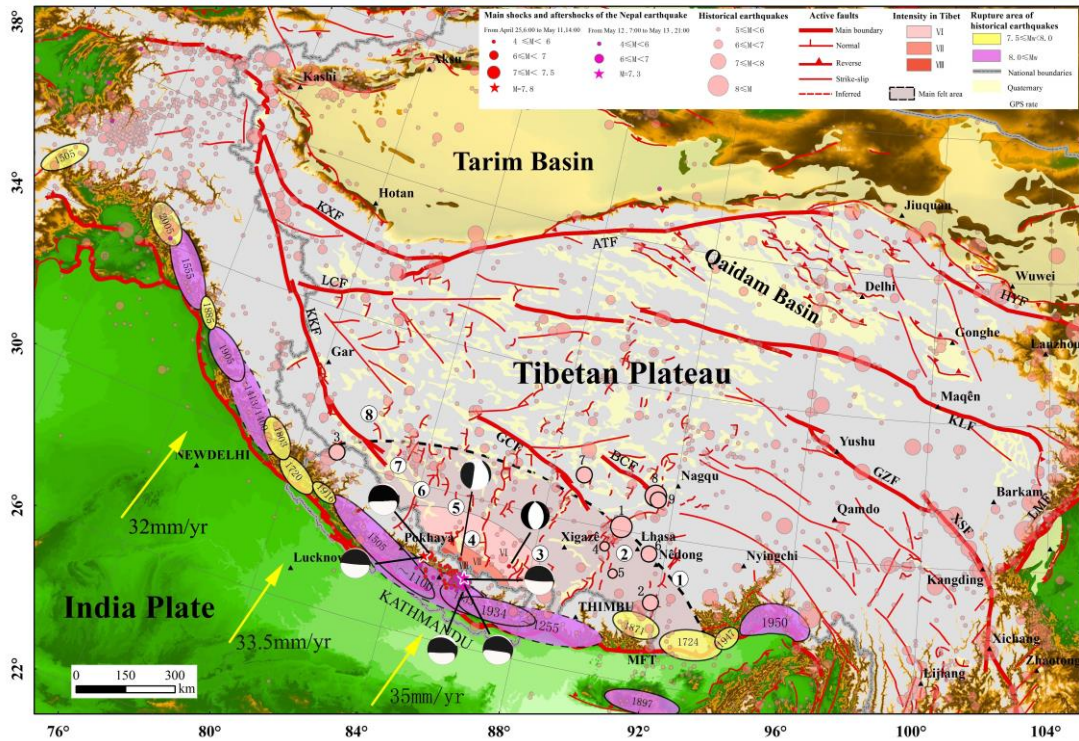

Fig.1 Principal active faults and historic earthquakes in the Himalaya Mountains, Tibetan Plateau and neighboring areas. The earthquake data is from The Science and Technology Committee and the archives in Xizang Autonomous Region, 1982; Bilham, 2004; Avouac, 2007; GPS data from Bettinelli et al, 2006; The focal mechanism solution data from USGS, 2015 a,b and Institute of Geophysics, China Earthquake Administration, 2015. Explanation: Rifts in southern Tibet, ①, Cona-Oiga rift; ②, Yadong-Gulu rift; ③, Dinggye-Xainza rift; ④, Gangga-Tangra Yumco rift; ⑤, Nyalam-Coqên rift; ⑥, Zhongba-Gêzê rift; ⑦, Kunggyu Co-Yagra rift; ⑧, Burang-Gêgyai rift. Thrust and strike-slip faults: MFT, Main Frontal Thrust fault of Himalaya; KKF, Karakorum fault; GCF, Gyaring Co fault; BCF, Beng Co fault; GZF, Ganzi fault; XSF, Xianshuihe fault; KLF, Kunlunshan fault; LMF, Longmenshan fault; LCF, Longmu Co Fault; KXF, Kangxiwa fault; AFT, Altyn Tagh fault; HYF, Haiyuan fault. Numbers 1-9,  $M \geq 6.8$  historic earthquake epicentral areas in southern Tibet: 1, 1411 M 8.0 Damxung-Yangbajain; 2, 1806 M 7.5 Cona; 3, 1883 M 7.0 Burang; 4, 1901 M 6.8 Nyêno; 5, 1909 M 6.8 Nagarze; 6, 1915 M 7.0 Sangri; 7, 1934 M 7.0 Gomang Co of Xainza; 8, 1951 M

8.0 Beng Co of Nagqu; 9,1952 M 7.5 Gulu of Nagqu.

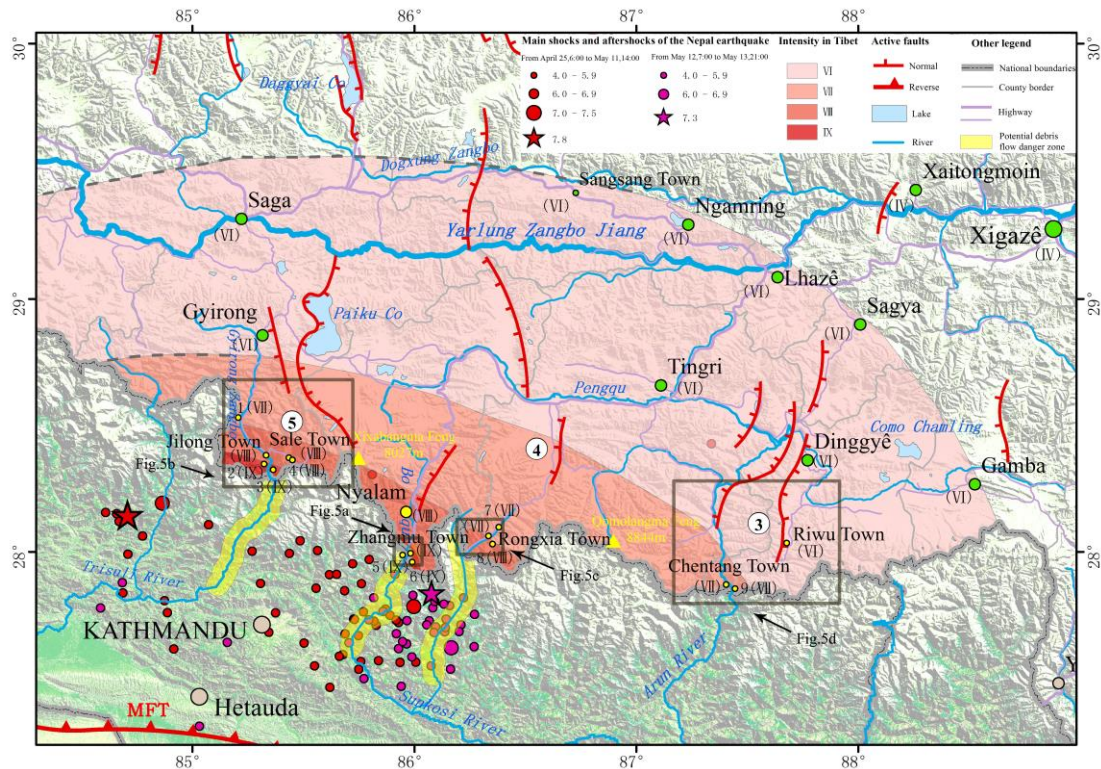

Fig. 2 Principal active faults and the distribution of seismic intensity of the 2015 Nepal earthquake in the southern Tibet region. Epicentral data from the USGS and seismic intensity from the China Earthquake Administration. The numbers and names of the principal S-N trending rifts in southern Tibet are same as on Fig. 1. The green landmarks show the sites which intensity are from China Earthquake Administration, and yellow landmarks show the spots which intensity is resulted from our field investigation. The survey spots: 1, Rema Villiage; 2, Jifu villiage; 3, Chongse Villiage; 4, Guoba Villiage; 5, Kodari Town of Nepal; 6, Lixin Viliage; 7, Bangse Villiage; 8, Zhuobude Villiage; 9, Natang Villiage.

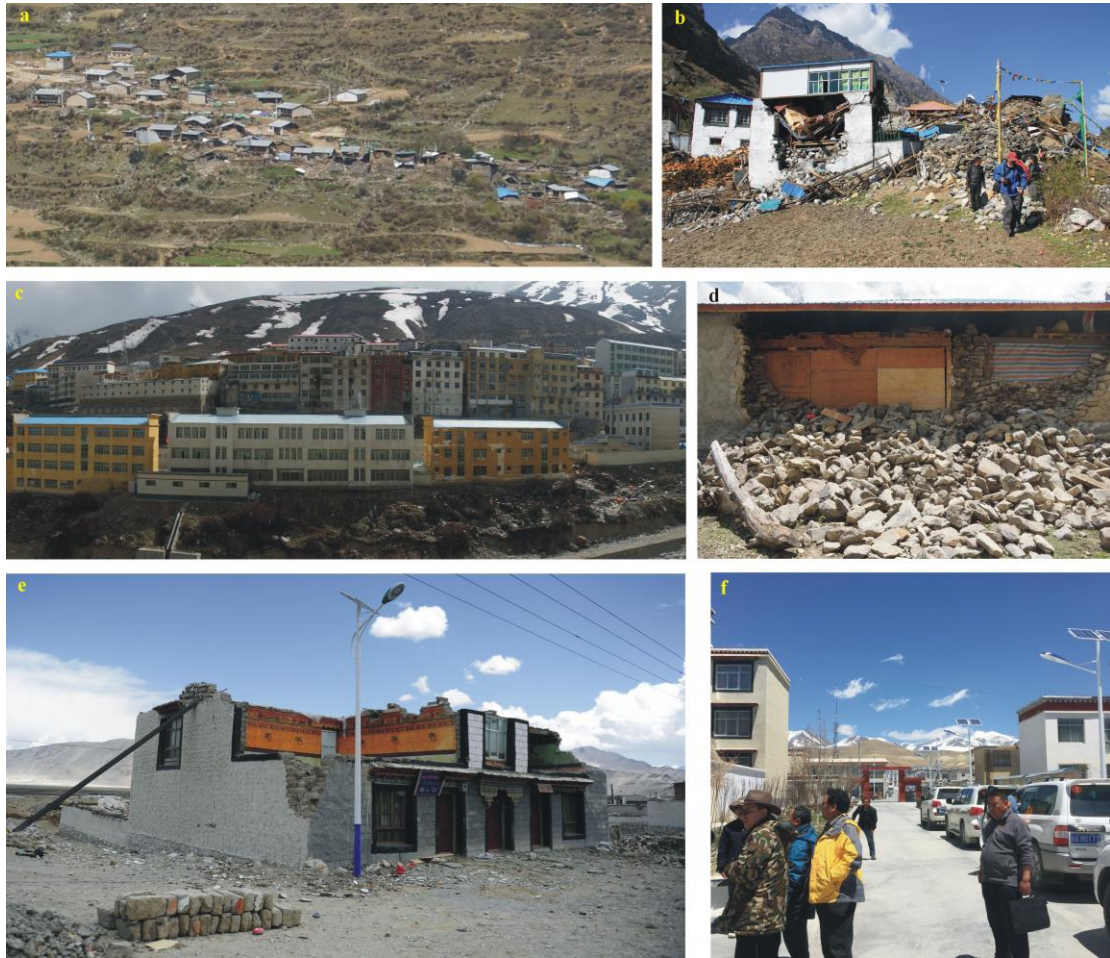

Fig. 3 The building damage resulting at different earthquake intensities: a, Many of the old stone pile or mud-brick houses collapsed, but the new brick houses rarely collapsed at Gangba Village in Sale Town in the intensity VIII zone; b, Similar building damage at Zhuobude Village of Rongxia Town in the intensity VIII zone; c, Most of buildings of brick-concrete structure did not collapse, but many walls showed obvious damage at Nyalam city located in the intensity VIII zone; d, Some walls of the stone-piled or mud-brick houses collapsed at Rema Village, Jilong County, in the intensity VII zone; e, Similar building damage at Chentang Town, Dinggyê county, in the intensity VII zone; f, Most of the houses remain intact and only few or individual walls of buildings had apparent small cracks at Jilong county city in the intensity VI zone.

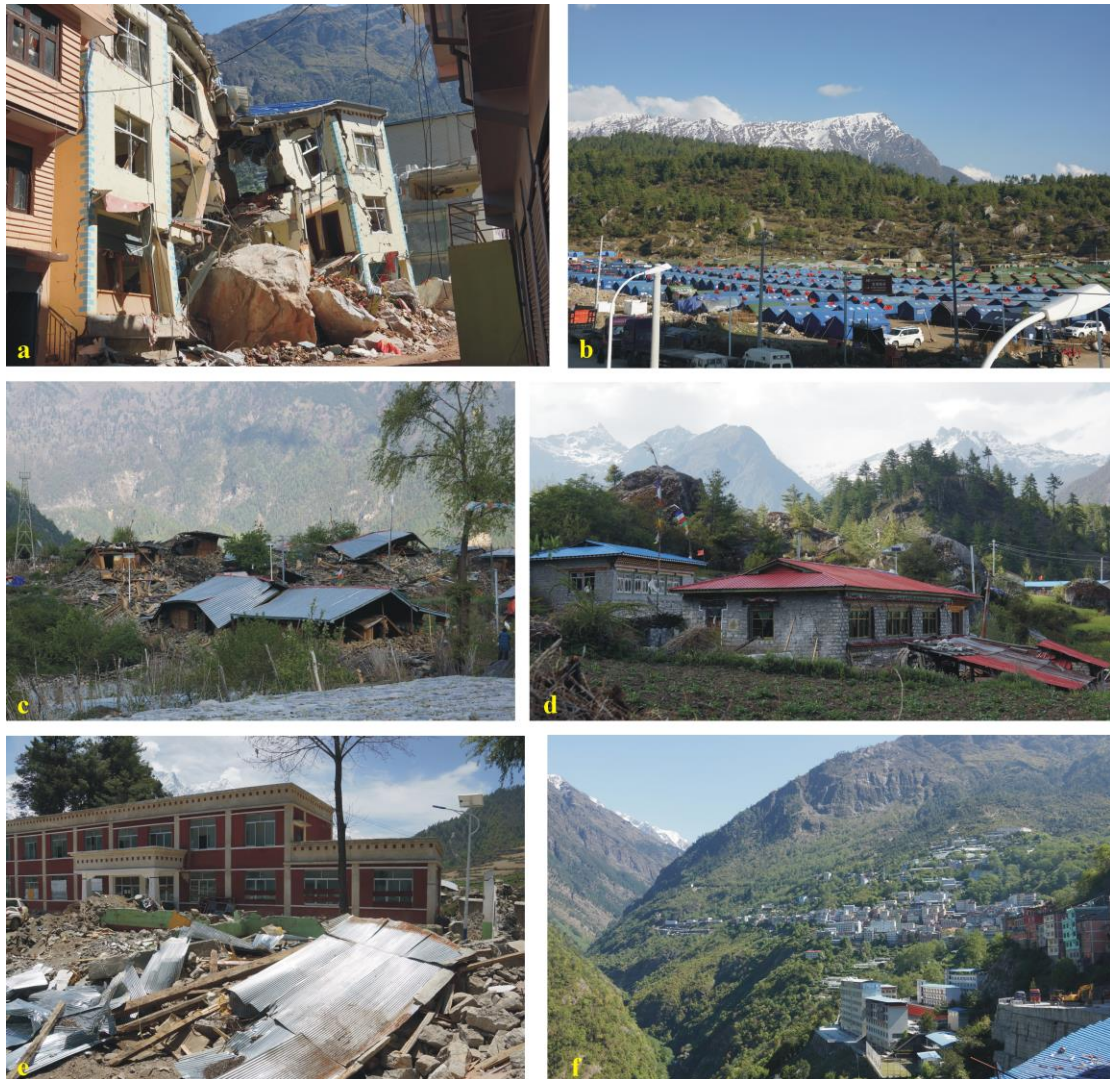

Fig. 4 Typical earthquake damage in southern Tibet and comparison of houses of different construction (locations shown in Fig. 5). Huge rockfall that smashed the resident committee office building at Disigang Village, about 0.7 km south of Zhangmu, where seven persons were killed (intensity IX) (site 1, Fig. 5a); b, A temporary settlement for earthquake survivors at Jilong; c, Destroyed houses of stone block masonry or adobe construction in Jifu Village southwest of Jilong (intensity VIII) (site 8, Fig. 5b); d, Houses of cement-bonded stone or brick construction in Jifu Village (intensity IX); e, Destroyed old houses and standing new buildings at Sale Town Primary School (intensity VIII) (site 7, Fig. 5b); f, Few collapsed houses at Zhangmu due to the brick structure or reinforced concrete construction (intensity IX).

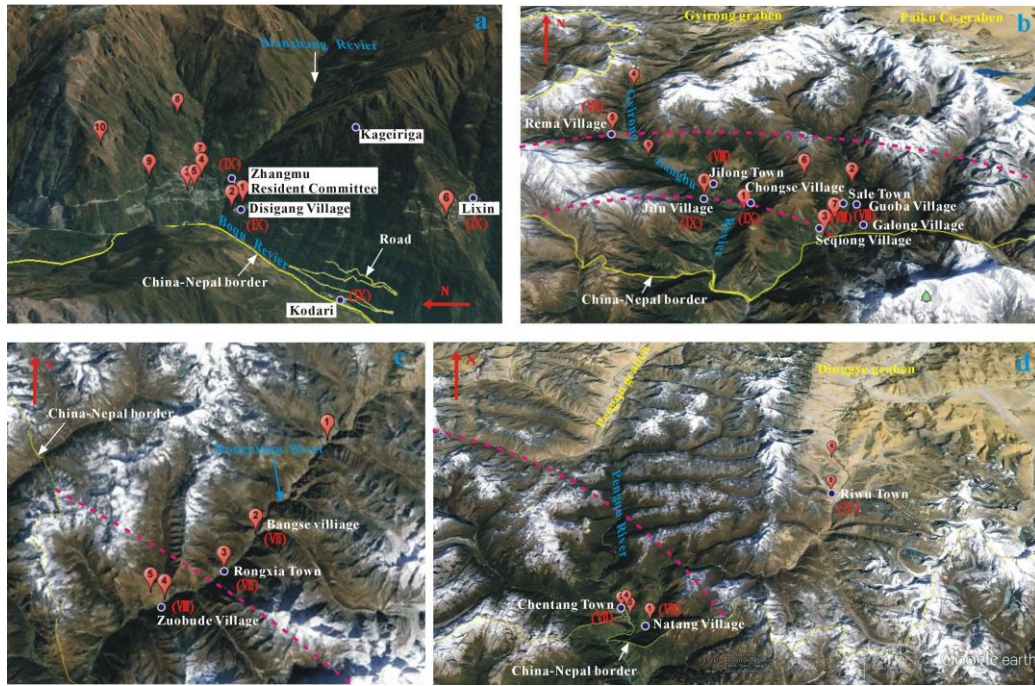

Fig. 5 Main surveyed sites of seismic effects after the Nepal earthquake, see Fig. 2 for the locations (image source Google Earth). Explanation: Roman numerals in brackets, seismic intensity values of the corresponding location; pink dotted lines, boundaries between different intensity zones. a, Zhangmu Town and vicinity; b, Jilong Town and environs; c, Rongxia Town and vicinity; d, Riwu Town to Chentang Town. Explanation: numbered balloons, sites of particular effects; red dashed lines, isoseismal boundaries.

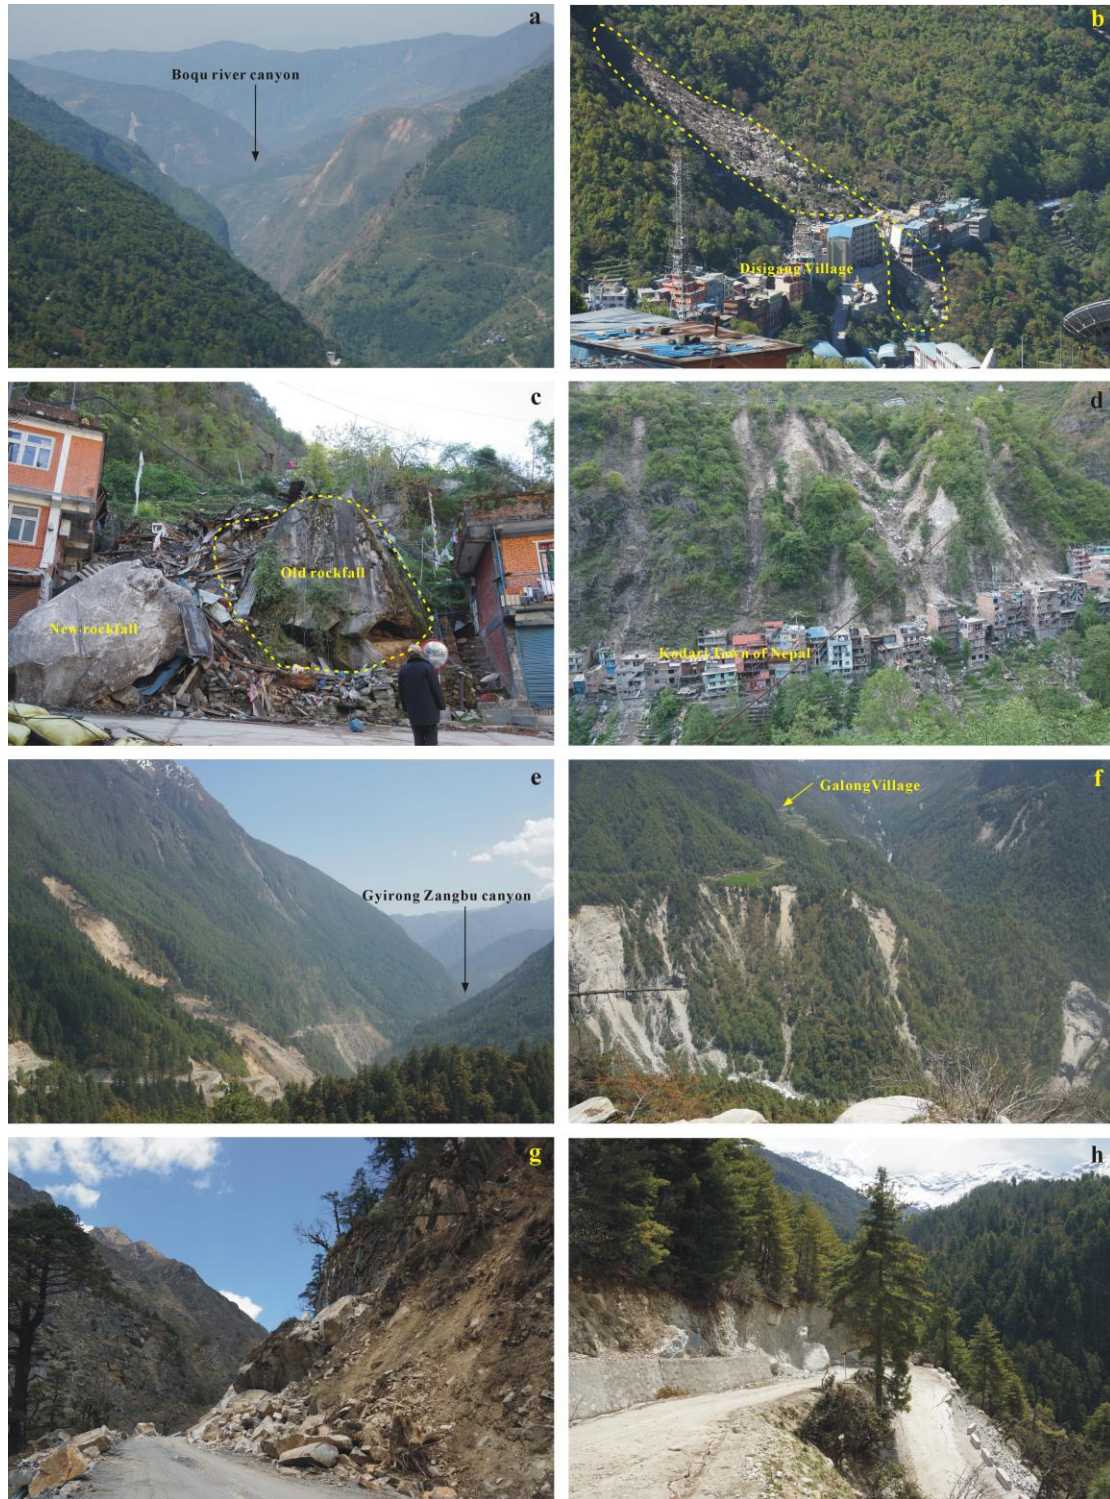

Fig. 6 Geologic effects caused during the Nepal earthquake: a, collapses in the Boqu valley; b, collapse at Disigang Village in the Boqu valley (Site1, Fig. 5a); c, new and old rockfalls at Disigang Village in the Boqu valley (Site1, Fig. 5a); d, destroyed buildings in Kodari, Nepal in the Boqu valley (Site in Fig. 4a); e, large landslide in Chongse Village in the Gyirong Zangbu valley (Site1, Fig. 5b); f, collapses in Galong Village in the Gyirong Zangbu valley (Site 7, Fig. 5b); g, collapses along highway from Gyirong County to Jilong Town in the Gyirong Zangbu

valley (Site 4, Fig. 5b); h, collapses and fissures along the highway from Jilong to ChongseVillage in the Gyirong Zangbo valley (Site1, Fig. 5b).

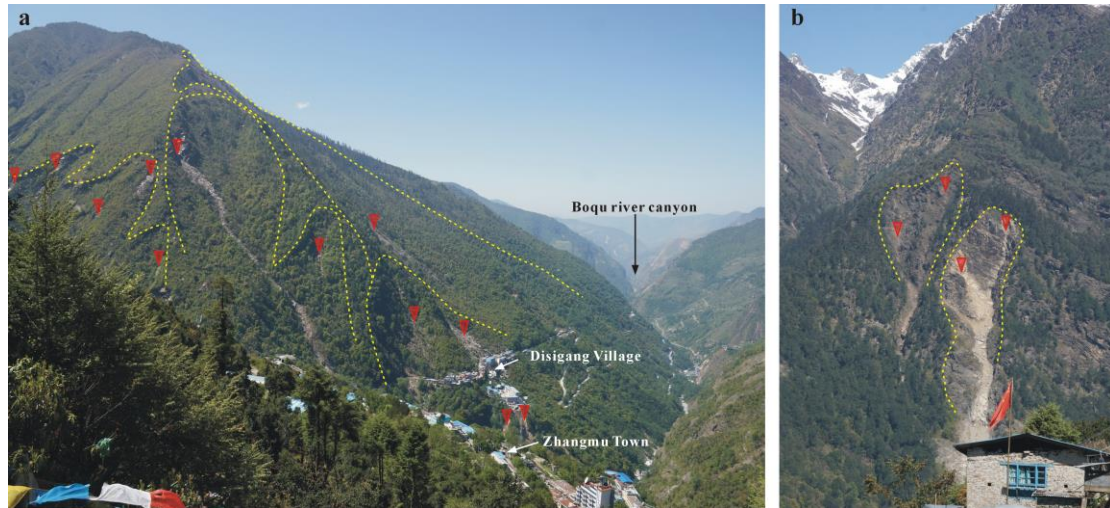

Fig. 7 New and old collapses and landslides on both banks of the Boqu River in Zhangmu Town; a. the east bank; b. the west bank. Explanation: yellow dotted line, boundary of old collapse and landslide; red triangle, new collapse during the Nepal earthquake.

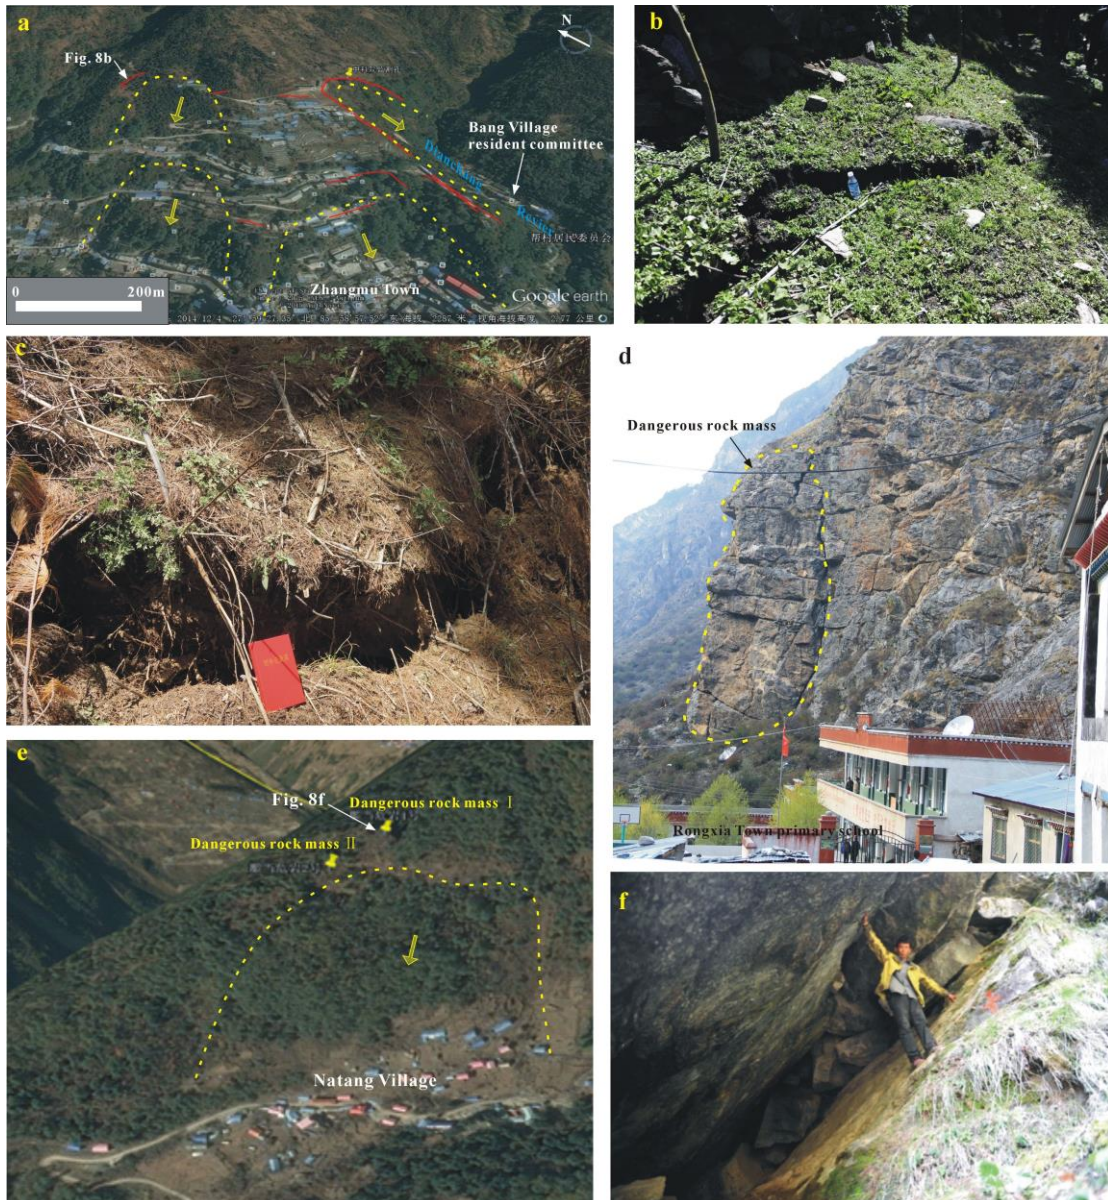

Fig. 8 Fissured and unstable rock masses formed by the earthquake that indicate hazards for additional landslides and rockfalls. Explanation: yellow dotted line, landslide group; arrow, slip direction; red line, new fissures formed during the Nepal earthquake; a, Old landslide group at Zhangmu. b. New fissure in the old landslide group at Zhangmu (site in Fig. 8a); c, Tension fissures at the back edge of Sale Village landslide (site7 in Fig. 5b); d, Dangerous rock mass at Rongxia Primary School (site 3 in Fig. 5c); e, Old landslide with unstable rock at Chentang Town (site 1 in Fig. 5d) and; f, Fissure between unstable rock and bedrock at Chentang (site in Fig. 8e).



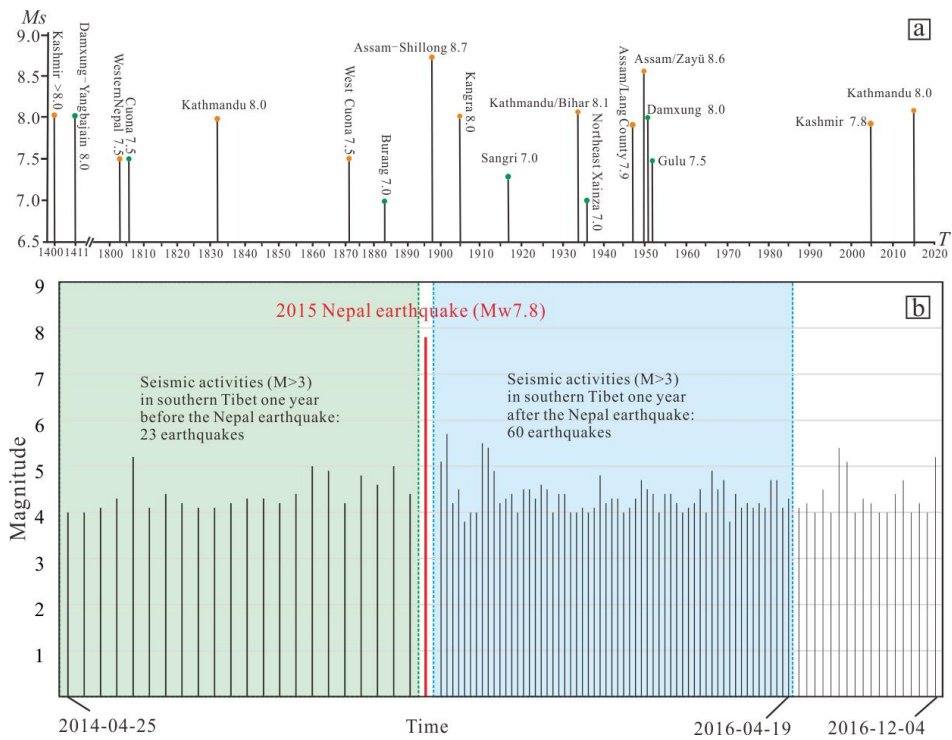

Fig.9 a: Magnitude ( $M_s$ ) –Time ( $T$ ) distribution of historical seismic activity along Himalaya and southern Tibet with the magnitude  $>7.0$ . The orange circles show the earthquakes occurred along Himalaya while the green circles show the earthquakes along southern Tibetan rift. b: Magnitude ( $M$ ) –Time ( $T$ ) distribution of seismic activity in southern Tibet in the period of one year before and after the 2015 Nepal earthquake (data came from USGS)
